RESEARCH ARTICLE

# Using machine learning and surface reconstruction to accurately differentiate different trajectories of mood and energy dysregulation in youth

Amelia Versace<sup>1\*</sup>, Vinod Sharma<sup>1</sup>, Michele A. Bertocci<sup>1</sup>, Genna Bebko<sup>1</sup>, Satish Iyengar<sup>2</sup>, Amanda Dwojak<sup>1</sup>, Lisa Bonar<sup>1</sup>, Susan B. Perlman<sup>1</sup>, Claudiu Schirda<sup>1</sup>, Michael Travis<sup>1</sup>, Mary Kay Gill<sup>1</sup>, Vaibhav A. Diwadkar<sup>3</sup>, Jeffrey L. Sunshine<sup>4</sup>, Scott K. Holland<sup>5</sup>, Robert A. Kowatch<sup>6</sup>, Boris Birmaher<sup>1</sup>, David Axelson<sup>7</sup>, Thomas W. Frazier<sup>8</sup>, L. Eugene Arnold<sup>7</sup>, Mary A. Fristad<sup>7</sup>, Eric A. Youngstrom<sup>9</sup>, Sarah M. Horwitz<sup>10</sup>, Robert L. Findling<sup>11</sup>, Mary L. Phillips<sup>1</sup>

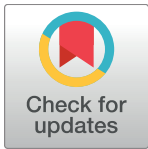

**1** Department of Psychiatry, Western Psychiatric Institute and Clinic, University of Pittsburgh Medical Center, University of Pittsburgh, Pittsburgh, Pennsylvania, United States of America, **2** Department of Statistics, University of Pittsburgh, Pittsburgh, Pennsylvania, United States of America, **3** Department of Psychiatry and Behavioral Neuroscience, Wayne State University, Detroit, Michigan, United States of America, **4** University Hospitals Case Medical Center/Case Western Reserve University, Cleveland, Ohio, United States of America, **5** Department of Radiology, University Hospitals Case Medical Center/Case Western Reserve University, Cleveland, Ohio, United States of America, **6** Research Institute at Nationwide Children's Hospital, Columbus, Ohio, United States of America, **7** Department of Psychiatry, Ohio State University, Columbus, Ohio, United States of America, **8** Pediatric Institute, Cleveland Clinic, Cleveland, Ohio, United States of America, **9** Department of Psychology, University of North Carolina at Chapel Hill, Chapel Hill, North Carolina, United States of America, **10** Department of Child and Adolescent Psychiatry, New York University School of Medicine, New York City, New York, United States of America, **11** Department of Psychiatry, Johns Hopkins University, Baltimore, Maryland, United States of America

\* [versacea@upmc.edu](mailto:versacea@upmc.edu)

**OPEN ACCESS**

**Citation:** Versace A, Sharma V, Bertocci MA, Bebko G, Iyengar S, Dwojak A, et al. (2017) Using machine learning and surface reconstruction to accurately differentiate different trajectories of mood and energy dysregulation in youth. PLoS ONE 12(7): e0180221. <https://doi.org/10.1371/journal.pone.0180221>

**Editor:** Fei Wang, Yale University School of Medicine, UNITED STATES

**Received:** March 1, 2017

**Accepted:** June 12, 2017

**Published:** July 6, 2017

**Copyright:** ©2017 Versace et al. This is an open access article distributed under the terms of the [Creative Commons Attribution License](https://creativecommons.org/licenses/by/4.0/), which permits unrestricted use, distribution, and reproduction in any medium, provided the original author and source are credited.

**Data Availability Statement:** All relevant data are within the paper and its Supporting Information files.

**Funding:** This research was supported by the National Institute of Mental Health grant 2R01 MH73953-06A1 (BB and MLP, University of Pittsburgh) and by the Pittsburgh Foundation (MLP, University of Pittsburgh Emmerling Endowed Chair in Psychotic Disorders). The funders had no role in study design, data collection

## Abstract

Difficulty regulating positive mood and energy is a feature that cuts across different pediatric psychiatric disorders. Yet, little is known regarding the neural mechanisms underlying different developmental trajectories of positive mood and energy regulation in youth. Recent studies indicate that machine learning techniques can help elucidate the role of neuroimaging measures in classifying individual subjects by specific symptom trajectory. Cortical thickness measures were extracted in sixty-eight anatomical regions covering the entire brain in 115 participants from the Longitudinal Assessment of Manic Symptoms (LAMS) study and 31 healthy comparison youth (12.5 y/o; -Male/Female = 15/16; -IQ = 104; -Right/Left handedness = 24/5). Using a combination of trajectories analyses, surface reconstruction, and machine learning techniques, the present study aims to identify the extent to which measures of cortical thickness can accurately distinguish youth with higher ( $n = 18$ ) from those with lower ( $n = 34$ ) trajectories of manic-like behaviors in a large sample of LAMS youth ( $n = 115$ ; 13.6 y/o; M/F = 68/47, IQ = 100.1, R/L = 108/7). Machine learning analyses revealed that widespread *cortical thickening* in portions of the left dorsolateral prefrontal cortex, right inferior and middle temporal gyrus, bilateral precuneus, and bilateral paracentral gyri and *cortical thinning* in portions of the right dorsolateral prefrontal cortex, left

and analysis, decision to publish, or preparation of the manuscript.

**Competing interests:** I have read the journal's policy and the authors of this manuscript have the following competing interests. This does not alter our adherence to PLOS ONE policies on sharing data and materials. Dr. Findling receives or has received research support, acted as a consultant and/or served on a speaker's bureau for Alcobra, American Academy of Child & Adolescent Psychiatry, American Physician Institute, American Psychiatric Press, Bracket, CogCubed, Cognition Group, Coronado Biosciences, Dana Foundation, Elsevier, Forest, Guilford Press, Ironshore, Johns Hopkins University Press, Jubilant Clinsys, KemPharm, Lundbeck, Medgenics, Merck, NIH, Neurim, Novartis, Otsuka, Oxford University Press, Pfizer, Physicians Postgraduate Press, Purdue, Rhodes Pharmaceuticals, Roche, Sage, Shire, Sunovion, Supernus Pharmaceuticals, Teva, Transcept Pharmaceuticals, Tris, Validus, and WebMD. Dr. Arnold has received research funding from Curemark, Forest, Lilly, Neuropharm, Novartis, Noven, Shire, Supernus, and YoungLiving (as well as NIH and Autism Speaks) and has consulted with or been on advisory boards for Arbor, Gowlings, Ironshore, Neuropharm, Novartis, Noven, Organon, Otsuka, Pfizer, Roche, Seaside Therapeutics, Sigma Tau, Shire, Tris Pharma, and Waypoint and received travel support from Noven. Dr. Frazier has received federal funding or research support from, acted as a consultant to, received travel support from, and/or received a speaker's honorarium from the Cole Family Research Fund, Simons Foundation, Ingalls Foundation, Forest Laboratories, Ecoeos, IntegraGen, Kugona LLC, Shire Development, Bristol-Myers Squibb, National Institutes of Health, and the Brain and Behavior Research Foundation. Dr. Youngstrom has consulted with Lundbeck, Janssen, Pearson, and Western Psychological Services about psychological assessment. Dr. Fristad receives royalties from Guilford Press, Inc., APPI, CFPSI and research funding from Janssen. Dr. Birmaher has or will receive royalties from for publications from Random House, Inc (New hope for children and teens with bipolar disorder) and Lippincott Williams & Wilkins (Treating Child and Adolescent Depression). He is employed by the University of Pittsburgh and the University of Pittsburgh Medical Center and receives research funding from NIMH. Dr. Kowatch is a consultant for Forest Pharmaceutical, Astra-Zeneca and the REACH Foundation. He receives research support from NIMH. He is employed by Ohio State University and an editor for Current Psychiatry. Dr. Sunshine receives research support from Siemens

ventrolateral prefrontal cortex, and right parahippocampal gyrus accurately differentiate (Area Under Curve = 0.89;  $p = 0.03$ ) youth with *different* (higher vs lower) trajectories of positive mood and energy dysregulation over a period up to 5 years, as measured by the Parent General Behavior Inventory-10 Item Mania Scale. Our findings suggest that specific patterns of cortical thickness may reflect transdiagnostic neural mechanisms associated with different temporal trajectories of positive mood and energy dysregulation in youth. This approach has potential to identify patterns of neural markers of future clinical course.

## Introduction

Difficulty regulating positive mood and energy is a feature not only of pediatric bipolar spectrum disorders (BPSD), [1–3] but also of other psychiatric disorders in youth, including other mood disorders, [2, 4–6] attention deficit hyperactivity disorder (ADHD) [4, 7–10] and oppositional defiant disorders (ODD). [4, 11] It is also present in youth without a psychiatric diagnosis. [12–14] Yet, little is known regarding the neural mechanisms underlying different developmental trajectories of positive mood and energy regulation over time, and how these trajectories predispose youth to specific future psychiatric disorders. Elucidating these neural mechanisms would provide objective neural markers to help identify youth most at risk of a specific future psychiatric disorder.

The Longitudinal Assessment of Manic Symptoms (LAMS) study [15, 16] is an ongoing longitudinal follow-up of youth who were aged 6–12 years upon study entry. They were recruited via nine outpatient mental health clinics and selected based on emotional and behavioral dysregulation, regardless of diagnosis. Paralleling the NIMH's Research Domain Criteria (RDoC) initiative on transdiagnostic studies of psychiatric illness, [17–19] the LAMS study has assessed mood symptoms and related behaviors every six months over five or more years in youth with different psychiatric disorders, including BPSD, depression, anxiety, attention deficit hyperactivity disorder (ADHD), oppositional defiant disorder (ODD) or conduct disorder (CD). One of the clinical rating scales periodically administered is the 10-item Parental General Behavioral Inventory (PGBI-10M), [20] a parental report of the child's difficulty regulating positive mood and energy. In LAMS youth, having a higher PGBI-10M score ( $\geq 12$ ) at study entry was associated with high risk of developing BPSD, [21] as well as other severe psychopathology [2, 22] and disorders [15, 16] in the future.

The LAMS study also includes assessments of neuroimaging correlates of different trajectories of symptom dimensions in a subgroup (LAMS:  $n = 103$ ; healthy peers:  $n = 40$ ). Here, specific patterns of activity and functional connectivity in emotional regulation circuitry were associated with different pre-imaging PGBI-10M trajectories. Specifically, LAMS youth with initially high PGBI-10M trajectories showed decreased dorsolateral prefrontal cortical activity during a task measuring attentional control over emotional distracters, and decreased functional connectivity between ventrolateral prefrontal cortex and amygdala, relative to LAMS youth with lower PGBI-10M trajectories. [23] These findings indicate associations between patterns of functional abnormalities in emotional regulation circuitry and previous clinical course in youth with different psychiatric disorders.

The advance of surface-based methods for neuroimaging analyses has enabled measurement of regional thickness and surface area across the cerebral cortical mantle with submillimeter accuracy. [24–28] Interestingly, using dynamic mapping in 32 youth with emotional dysregulation disorders and/or behavioral developmental disorders, Gogtay et al. tracked gray

Healthcare. Drs. Versace, Sharma, Bertocci, Bebko, Iyengar, Perlman, Schirda, Travis, Diwadkar, Axelson, Holland, Horwitz and Phillips have declared that no competing interests exist. Mrs. Dwojak, Bonar and Gill reported no biomedical financial interests or potential conflicts of interest.

matter cortical changes preceding the onset of their first manic episode.[29] A gradual increase over time in gray matter volume was shown in youth who converted to BPSD, relative to healthy control youth. Specifically, increased gray matter volume was shown in bilateral temporal cortices and in left ventrolateral prefrontal cortex in youth who converted to BPSD. [29] Global cortical thickness abnormalities were also reported in youth with ADHD in a longitudinal study of 163 youth with ADHD and 166 healthy controls.[30] Here, developmental trajectory analyses revealed a stable reduction over 5.7 years of left medial prefrontal cortical thickness in youth with ADHD who developed a worse clinical course than those with a better course (and controls).[31] Cortical abnormalities have also been reported in the superior temporal gyrus in youth with CD.[32] Together, these findings suggest that cortical thickness patterns may predispose to the development of specific psychiatric disorders in youth with emotional and/or behavioral developmental disorders. Yet, the extent to which patterns of cortical thickness can help distinguish youth with symptom trajectories, cutting across diagnoses, [33] remains unknown.

Machine learning is an area of artificial intelligence concerned with the development of algorithms and techniques able to automatically extract information from the data.[34] Recent evidence indicates that the combination of machine learning and neuroimaging techniques may help classify individuals, case by case, into different diagnostic groups or characterize individuals by different clinical course trajectories.[33]

In the present study, we aimed to use a combination of structural neuroimaging, specifically surface reconstruction, latent class analysis and machine learning to identify the extent to which patterns of cortical thickness could be used to accurately classify youth with different symptoms at the individual level. Specifically, we focused on trajectories of PGBI-10M scores, given the important relationships that we previously observed between PGBI-10M scores and development of future psychiatric disorders in LAMS youth (see above). *The absence of prior studies combining such approaches precluded formulation of specific hypotheses regarding the precise nature of cortical thickness patterns that would be the best classifiers of previous clinical course.* We thus examined 68 parcellated regions covering the cerebral cortical mantle, and aimed to determine the extent to which patterns of cortical thickness could differentiate youth with different clinical profiles. Specifically, this approach holds promise as a strategy to identify transdiagnostic pathophysiologic mechanisms of positive mood and energy dysregulation in youth with different emotional and/or behavioral developmental disorders.

## Method and materials

### Participants

The study received institutional review board approval at all scan sites (Case Western Reserve University [9–10–28], Cincinnati Children's Hospital Medical Center [2010–3347], and University of Pittsburgh Medical Center [PRO10090442]). Parents or guardians provided written informed consent, and children provided written informed assent prior to study participation. Participants received monetary compensation and a framed picture of their structural neuroimaging scan. One-hundred-twenty-eight youth, recruited from the LAMS cohort of 685, and thirty-four newly recruited healthy comparison youth (HC) participated in the neuroimaging component of the LAMS study as follows: Case Western Reserve University (n = 32 LAMS; n = 14 HC); Cincinnati Children's Hospital (n = 48 LAMS; 6 HC); and University of Pittsburgh Medical Center (n = 48 LAMS; 14 HC). All HC were recruited using local advertising at the three sites, and were free of any psychiatric disorder. Their first-degree relatives were free of mood disorders and psychosis, and their second-degree relatives were free of BPSD and any

psychosis. Inclusion and exclusion criteria for LAMS youth have been previously described at length [22, 35] and synthesized in the [S1 Materials](#) and Table A in [S1 Materials](#).

## Clinical assessment

Semi-annual parent/guardian's assessments of PGBI-10M score,[20, 36] semi-annual parent and child assessments of anxiety symptoms using the Screen for Child Anxiety Related Emotional Disorders(SCARED),[37] and annual assessments of manic and depressive symptom severity using respectively the Schedule for Affective Disorders and Schizophrenia for School-Age Children(K-SADS) Mania Rating Scale (KMRS),[38] and Depression Rating Scale (KDRS),[39] were performed. Additionally, SCARED, KDRS, and KMRS were repeated on scan day. Exclusion criteria were: systemic medical illnesses, neurological disorders, history of trauma with loss of consciousness, use of central nervous system effecting medications, IQ<70 assessed by the Wechsler Abbreviated Scale of Intelligence (WASI), positive drug and/or alcohol screen on the day of MR scan, alcohol/substance abuse in the past 3 months (determined by the Schedule for Affective Disorders and Schizophrenia for School Age Children, Present and Lifetime Version; K-SADS-PL-W), significant visual disturbance, non-English speaker, history of physical/sexual abuse, autistic spectrum disorders/developmental delays, pregnancy, claustrophobia, and metal in the body.

## Neuroimaging protocol and surface reconstruction analysis

**Structural acquisition.** Data were acquired using an axial 3D MPRAGE sequence (TE/TI/TR = 3.29ms /900ms/2200ms, flip angle = 9, isotropic 1mm<sup>3</sup> voxel, 192 axial slices, matrix size = 256x192; time: 7'02").

**Surface reconstruction analysis.** Surface Reconstruction Analysis and quantification of thickness measurements were performed in 34 parcellated regions covering the cerebral cortical mantle in each hemisphere (Fig 1) using FreeSurfer software package (version-5.3; <https://surfer.nmr.mgh.harvard.edu>). This method has been extensively described in previous methodological papers [24–26] and is briefly described in the [S1 Materials](#).

## Statistical analysis

**Longitudinal trajectory analysis.** Longitudinal Trajectory Analysis of PGBI-10M Scores was performed on the Statistical Analysis System (SAS) platform using 'Proc Traj' software package, freely available at <http://www.andrew.cmu.edu/user/bjones/index.html>. *Proc Traj* is a specialized group-based mixture method that identifies distinct homogenous clusters (classes) of trajectories in a given population, over time.[40, 41]Trajectories of behaviors associated with difficulty regulating positive mood and energy were thereby determined in the 115 LAMS youth with usable neuroimaging data, using the semi-annual PGBI-10M ratings collected for up to 5 years. Previously employed to describe trajectories of depressive symptoms,[42, 43] the employment of *Proc Traj* in the present study allowed fitting two components simultaneously: 1. a censoring normal mixture model of the PGBI-10M score as a polynomial function of time, and 2. a latent class model using the multinomial logistic regression of the trajectory classification. The number of trajectories was determined based on (a) Bayesian Information Criterion, (b) posterior probabilities of group membership,[44] and (c) presence of a minimum of 10% of participants per trajectory. Trajectories were tested for linear, quadratic, and cubic trends. Z-scores, and associated p-values were then derived to determine the differences between

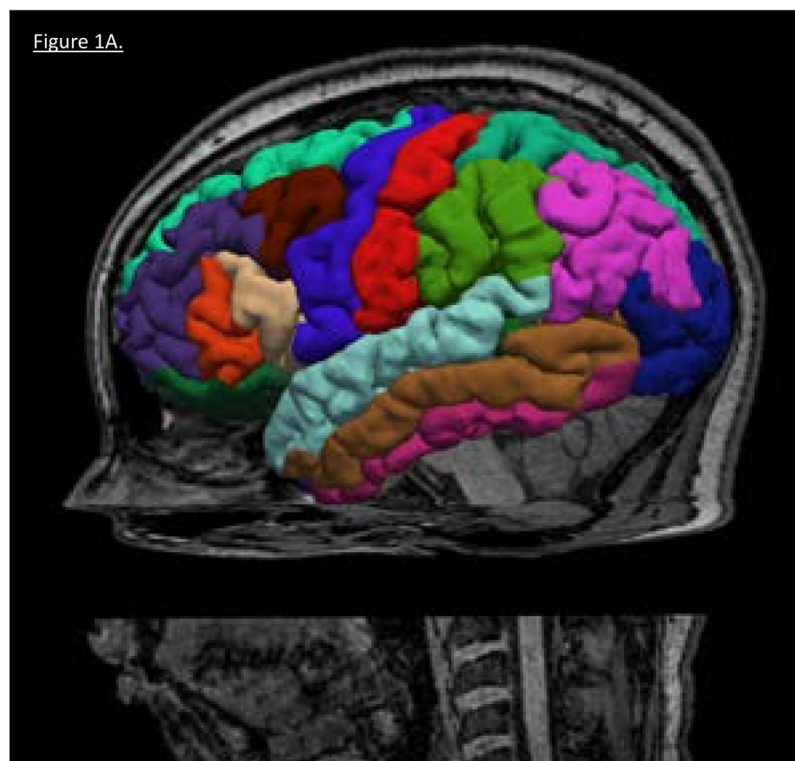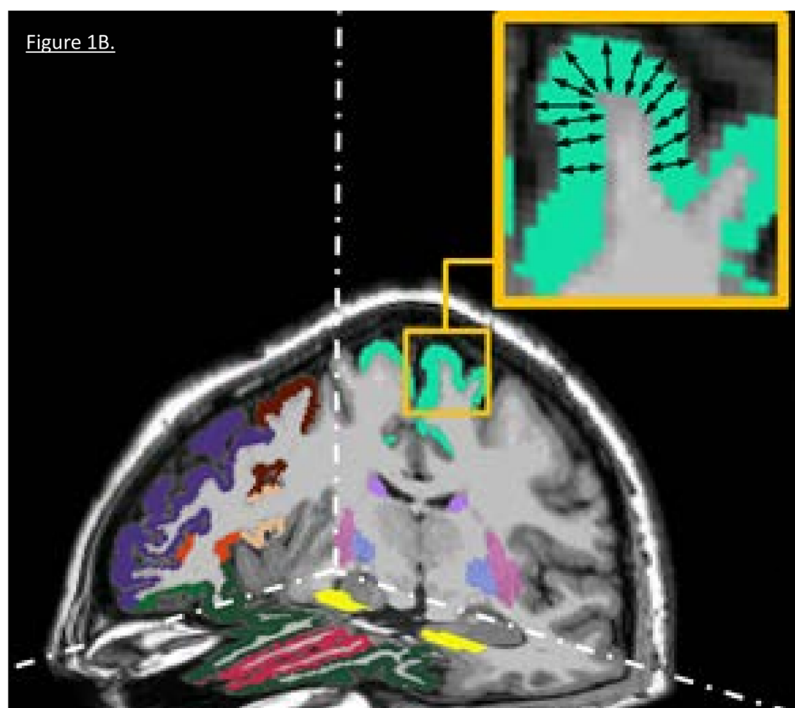

**Fig 1. Panel A.** Isosurface view of cortical surface reconstruction and cortical parcellation in one of our participants. **Panel B.** 3D view of cortical thickness of parcellated regions in the same participant. Here, few parcellated regions are displayed in native space, in accordance with the Freesurfer color-coding convention, and overlaid on the anatomical (mprage) image of the same participant.

<https://doi.org/10.1371/journal.pone.0180221.g001>

slopes of main class-trajectories, using the following formula[45]:

$$z = \frac{\beta_j - \beta_i}{\sqrt{(\text{SE}_{\beta_j})^2 + (\text{SE}_{\beta_i})^2}}.$$

Between-class differences in demographic and clinical variables were examined using independent two-tailed t-tests or  $\chi^2$  tests, as appropriate (Table B in the [S1 Materials](#)). Gender, age at scan, handedness, socioeconomic status (SES), site, signal to noise, BPSD diagnosis at scan (yes/no), depressive spectrum disorder diagnosis at scan (yes/no), ADHD diagnosis at scan (yes/no), and disruptive behavior disorder diagnosis (CD, ODD) at scan (yes/no) were entered as covariates of no-interest in this analysis. For a detailed description of how neuroimaging data were combined across site, see the [S1 Materials](#).

**Regularized linear logistic regression and machine learning analyses.** Regularized Linear Logistic Regression and Machine Learning Analyses were performed on neuroimaging data after surface reconstruction analysis using *glmnet* and *caret* libraries, implemented in the R source package.[46] *Glmnet* is a freely available library (<https://cran.r-project.org/web/packages/glmnet/index.html>).[46] This includes fast algorithms for estimation of penalty terms (i.e.,  $\ell_1$  in least absolute shrinkage and selection operator (LASSO),  $\ell_2$  in ridge regression and  $\ell_1$ - $\ell_2$  mixtures in elastic-net) for regularized linear regression models using cyclical coordinate descent, computed along a regularization path. Penalization techniques, such as ridge regression,[47] LASSO[48] and elastic-net[49] regression, have gained popularity over classical ordinary least squares estimates, allowing for the testing of a relatively large number of variables relative to the number of study participants, while minimizing the risk of inflating model error or overfitting. For example, ridge regression[47] minimizes the residual sum of squares, subject to a bound on the  $\ell_2$ -norm of the coefficients. As a continuous shrinkage method, ridge regression achieves its better prediction performance through a bias—variance trade-off, yet maintaining all the predictors in a given model. A more parsimonious alternative, namely the LASSO was proposed by Tibshirani.[48] By imposing an  $\ell_1$ -penalty on the regression coefficients, LASSO involves both continuous shrinkage and automatic variable selection, and simultaneously removes irrelevant predictors in a given model. While both techniques represent a valid approach in variable selection, LASSO is much more appealing due to its parsimoniousness. Yet, in the context of a dataset with highly inter-correlated variables, the selection of one variable over another is arbitrary. To overcome this limitation, a new regularization technique, namely elastic-net, has been recently proposed.[49] Elastic-net linearly combines the  $\ell_1$  and  $\ell_2$  penalty terms of ridge and LASSO methods. Thus, similar to ridge and LASSO, elastic-net simultaneously does automatic variable selection and continuous shrinkage, further adding a group-selection feature for highly correlated variables. All these techniques belong to the same family of regularized regression models where a scalar value (from 0 to 1) of the *alpha* parameter defines the weight of LASSO( $\ell_1$ ) versus ridge ( $\ell_2$ ) optimization, where *alpha* = 1 represents LASSO regression, *alpha* close to 0 approaches ridge regression, and in-between *alpha* values represent elastic-net optimization. Thus, depending on the characteristics of a given dataset, one technique might be more appropriate than another. To identify the best model for our data, the Classification And REgression Training (*caret*; [caret.r-project.org](https://caret.r-project.org)) package was used. In *caret*, a set of functions relevant to machine learning, such as data splitting, pre-processing, feature selection, model tuning using resampling, variable importance estimation, and more, are available. In the present study, the combined use of *caret* and *glmnet* allowed for the identification of the optimal values of *alpha* (ridge vs elastic-net vs lasso) and *lambda* parameters. Elastic-net resulted to be the optimal model for our data (see [results](#) section). In brief, *caret* was used to: 1. stratify a random split of the data in

training-test samples (60% and 40%, respectively using the createDataPartition function); 2. evaluate the effect of model tuning alpha and lambda parameters on performance (expand.grid function); 3. choose the “optimal” regularized regression model across these parameters from a training set (trainContol function; 10-fold cross-validation); and 4. estimate model performance in the training and test sample (summaryFunction, classProbs and predict functions). To this end, dROC library was used to provide measures of performance (sensitivity, specificity, accuracy; area under the curve; PPV and NPV) of this classification analysis. Specifically, ROC analysis provides tools to select optimal models and to discard suboptimal ones independently from (and prior to specifying) the cost context or the class distribution in diagnostic decision making.[50] Thus, 34 cortical thickness measures for each hemisphere (68 in total) were used as independent variables, with PGBI-10M trajectory classes, defined as described above, as dependent (outcome) variables. Gender, age at scan, handedness, IQ, SES, site, signal to noise ratio (see below), different diagnoses at scan including BPSD (yes/no), depressive spectrum disorder (yes/no), ADHD (yes/no), and disruptive behavior disorder (CD, ODD; yes/no), and 6 medication classes in the day of the scan, including mood stabilizer (ON/OFF), stimulant (ON/OFF), non-stimulant (ON/OFF), antidepressant (ON/OFF), antipsychotic (ON/OFF) and anxiolytic (ON/OFF) medications were entered as additional potential predictors in this analysis. Cortical thickness by age (or gender) interaction was also modelled in this analysis. The optimal regularized regression model was then used to derive the variable importance selection, based on the magnitude of the parameter estimates (i.e., betas). The sign (positive or negative) of the betas were used for interpretation the directionality of a given predictor (e.g., cortical thinning in a given brain region was derived by a negative beta).

**Exploratory analyses.** Two Multivariate Analyses of Variance (MANOVAs; one for patterns of cortical thickening and one for patterns of cortical thinning) were used to examine relationships between cortical thickness in brain regions that accurately distinguished the two extreme PGBI-10M trajectories and: KMRS, KDRS, SCARED scores in LAMS youth.

## Results

### Trajectory analysis

Due to data loss or failure to meet our data quality control criteria (see the [S1 Materials](#)), 13 participants were excluded from analyses (Table B in the [S1 Materials](#)), leaving 115 LAMS participants (13.6 y/o; M/F = 68/47; IQ = 100.1; R/L = 108/7) and 31 HC (12.5 y/o; M/F = 15/16; IQ = 104; R/L = 24/5). On the scan day, only one of the 115 LAMS youth did not have any diagnosis, 22 had a single diagnosis, and the other 92 had two or more comorbid diagnoses. 50.4% of LAMS youth were taking one or more medications on the scan date, including antidepressants, antipsychotics, mood stabilizers, stimulants, and/or non-stimulant ADHD medications. Demographic and clinical characteristics of the sample are reported in [Table 1](#) (entire sample) and in Table B in the [S1 Materials](#) (main class-Trajectories).

Longitudinal Trajectory Analysis of PGBI-10M identified three (1.  $\beta_0 = 16.2$ ,  $\beta_1 = -3.0$ ;  $p = 0.05$ ; 2.  $\beta_0 = 6.6$ ,  $\beta_1 = -5.0$ ;  $p < 0.001$ ; 3.  $\beta_0 = 0.3$ ,  $\beta_1 = 0.3$ ,  $\beta_2 = 3.6$ ;  $p = 0.07$ ) main pre-imaging PGBI-10M class-trajectories in the 115 LAMS youth included in the study ( $Z_{(\text{class 1. vs class 2.})}$  score = -3.24,  $p = 0.002$ ;  $Z_{(\text{class 1. vs class 3.})}$  score = 4.3,  $p < 0.001$ ; and  $Z_{(\text{class 2. vs class 3.})}$  score = 4.8,  $p < 0.001$ ). Specifically, there were 18 youth (mean age[SD] = 14[2.2], gender ratio = 11/7 [F/M], handedness = 18/0, mean IQ[SD] = 98[17.3] SES = 33) with higher scores at study entry followed mostly by a stable course (i.e., PGBI-10M score  $\geq 12$  at all times in 6 out of 18 youth and in at least 50% of times in 17 out of 18 youth). Only 1 out of 18 youth showed an unstable course (i.e., PGBI-10M score  $< 12$  for more than 50% of the times); 61 youth (mean

Table 1. Demographic and clinical variable in 3 LAMS sites (Cleveland, Cincinnati and Pittsburgh).

|                                        | SITE  | N     | Mean[SD]     | Stats.          | Sig. (2-sided)  |
|----------------------------------------|-------|-------|--------------|-----------------|-----------------|
| Age at Scan                            | CASE  | 44    | 13.3 [2.4]   | F = 0.1         | .934            |
|                                        | CINCI | 45    | 13.3 [2.3]   |                 |                 |
|                                        | PITT  | 57    | 13.5 [2.1]   |                 |                 |
| Base IQ                                | CASE  | 44    | 100.2 [17.8] | F = 0.5         | .600            |
|                                        | CINCI | 45    | 102.9 [13.6] |                 |                 |
|                                        | PITT  | 57    | 100.1 [15.2] |                 |                 |
| KMRS                                   | CASE  | 44    | 2.1 [4.8]    | F = 2.6         | .076            |
|                                        | CINCI | 45    | 5.1 [7.4]    |                 |                 |
|                                        | PITT  | 57    | 3.2 [6.2]    |                 |                 |
| KDRS                                   | CASE  | 44    | 1.8 [4.1]    | F = 2.7         | .071            |
|                                        | CINCI | 45    | 3.6 [4.0]    |                 |                 |
|                                        | PITT  | 57    | 3.6 [4.7]    |                 |                 |
| SCARED ^*                              | CASE  | 44    | 9.2 [10.0]   | F = 0.6         | .527            |
|                                        | CINCI | 40    | 11.2 [9.6]   |                 |                 |
|                                        | PITT  | 57    | 11.4 [11.0]  |                 |                 |
| Gender [M/F]                           | CASE  | 44    | 0.5 [0.5]    | F = 0.9         | .413            |
|                                        | CINCI | 45    | 0.4 [0.5]    |                 |                 |
|                                        | PITT  | 57    | 0.4 [0.5]    |                 |                 |
| SES [higher vs lower] \$               | CASE  | 44    | 1.5 [0.5]    | F = 1.0         | .371            |
|                                        | CINCI | 45    | 1.5 [0.5]    |                 |                 |
|                                        | PITT  | 57    | 1.4 [0.5]    |                 |                 |
| Handedness [L/R]                       | CASE  | 44    | 1.1 [0.3]    | F = 0.3         | .747            |
|                                        | CINCI | 43    | 1.1 [0.3]    |                 |                 |
|                                        | PITT  | 57    | 1.1 [0.3]    |                 |                 |
| PGBI-10M # (lower<12 / higher>13)      | CASE  | 26/5  | —            | $\chi^2 = 0.8$  | .658            |
|                                        | CINCI | 32/7  | —            |                 |                 |
|                                        | PITT  | 40/5  | —            |                 |                 |
| Bipolar Disorder at Scan [NO/YES] #    | CASE  | 18/13 | —            | $\chi^2 = 4.0$  | .137            |
|                                        | CINCI | 24/15 | —            |                 |                 |
|                                        | PITT  | 35/10 | —            |                 |                 |
| Depression at Scan [NO/YES] #          | CASE  | 30/1  | —            | $\chi^2 = 1.8$  | .398            |
|                                        | CINCI | 35/4  | —            |                 |                 |
|                                        | PITT  | 43/2  | —            |                 |                 |
| Anxiety at Scan [NO/YES] #             | CASE  | 30/1  | —            | $\chi^2 = 6.4$  | <b>0.041**</b>  |
|                                        | CINCI | 32/7  | —            |                 |                 |
|                                        | PITT  | 43/2  | —            |                 |                 |
| ADHD at Scan [NO/YES] #                | CASE  | 21/10 | —            | $\chi^2 = 6.9$  | .140            |
|                                        | CINCI | 19/20 | —            |                 |                 |
|                                        | PITT  | 18/26 | —            |                 |                 |
| Conduct-ODD-Disrupt at Scan [NO/YES] # | CASE  | 28/3  | —            | $\chi^2 = 13.5$ | <b>0.001***</b> |
|                                        | CINCI | 19/20 | —            |                 |                 |
|                                        | PITT  | 28/17 | —            |                 |                 |

(Continued)



Table 1. (Continued)

|                                         | SITE  | N    | Mean[SD] | Stats.         | Sig. (2-sided) |
|-----------------------------------------|-------|------|----------|----------------|----------------|
| Substance Dependence at Scan [NO/YES] # | CASE  | 30/1 | —        | $\chi^2 = 2.7$ | .255           |
|                                         | CINCI | 39/0 | —        |                |                |
|                                         | PITT  | 45/0 | —        |                |                |

^ Equal variances not assumed

\* Missing info in 5 LAMS participants.

# Data available in LAMS participants only

§ Lower SES includes No education, High School, GED, High School Diploma, Some Post-High School w/o degree or certification; Higher SES includes Associate's Degree, Other Post-High School certification, Bachelor's Degree or Higher

\*\* Post-hoc analyses revealed that among LAMS youth included in this study, those recruited in the Cincinnati site had higher rate of Anxiety Disorders than the LAMS youth recruited from the Cleveland and Pittsburgh sites ( $p = .029$  and  $p = .028$ , respectively).

\*\*\* Post-hoc analyses revealed that among LAMS youth included in this study, those recruited in the Cleveland site had lower rate of Conduct Disorder-Disruptive or Oppositional Defiant Disorders than the LAMS youth recruited from Cincinnati and Pittsburgh sites ( $p < 0.001$  and  $p = .009$ , respectively).

<https://doi.org/10.1371/journal.pone.0180221.t001>

age[SD] = 13[2.1], gender ratio = 23/38 [F/M], handedness = 57/4, mean IQ[SD] = 97[14.7], and SES = 29) with 'intermediate' trajectories who were clinically more heterogeneous (i.e., 23 out of 61 youth showed PGBI-10M score  $\geq 12$  for at least 30% of the times); and 36 youth (mean age[SD] = 14[2.0], gender ratio = 12/24 [F/M], handedness = 33/3, mean IQ[SD] = 106 [16.8], and SES = 34) with lower scores at study entry followed by a stable course (i.e., PGBI-10M score  $< 12$  at all times in 34 out of 36 youth. Two youth only reported a PGBI-10M score of 15 in one of the pre-imaging follow-up times) There were no main differences in total cerebral volume or total gray matter volume among the three principal PGBI-10M class-trajectories. (Fig 2 and Table 1).

### Elastic-net linear logistic regression and machine learning analyses

Our main predictive analysis focused on the ability of cortical thickness measures to accurately classify LAMS youth into those with higher ( $n = 18$ ) vs. those with lower ( $n = 36$ ) pre-imaging PGBI-10M score trajectories. A training-test split (60%) of the sample was done and a 10-fold cross validation was used in the training phase to create this predictive model. Finally, predictors identified in the training phase were further validated on the test sample (40%) to estimate the accuracy of this model. Optimized parameters for the main predictive model (higher vs lower PGBI-10M trajectories) were  $\alpha = 0.1$ ,  $\lambda = 0.1$ .  $\alpha$  values between 0 and 1 represent elastic-net optimization. Here, elastic-net linear logistic regression revealed that *patterns of cortical thickening* in key regions of the prefrontal cortex (i.e., left caudal middle frontal gyrus, pars triangularis and opercularis of the left inferior frontal gyrus), temporo-parietal cortex (right inferior and middle temporal gyrus, bilateral precuneus, and bilateral paracentral gyrus) and left cuneus, but *patterns of cortical thinning* in key regions of the prefrontal cortex (i.e., right caudal middle frontal gyrus, pars orbitalis of the left inferior frontal gyrus and left lateral orbital frontal gyrus) and the right parahippocampal gyrus of the temporal cortex accurately distinguished (statistics of this model upon the test sample: sensitivity = 0.83; specificity = 0.92; accuracy = 0.89; area under the curve = 0.95; Positive Predicted Value = 0.83 and Negative Predicted Value = 0.92;  $p = 0.03$ ) youth with higher from those with lower PGBI-10M trajectories (Fig 3). Taking mood stabilizer medications and having a diagnosis of BPSD were also relevant predictors in distinguishing LAMS youth with higher, versus those with lower, pre-imaging PGBI-10M trajectories.

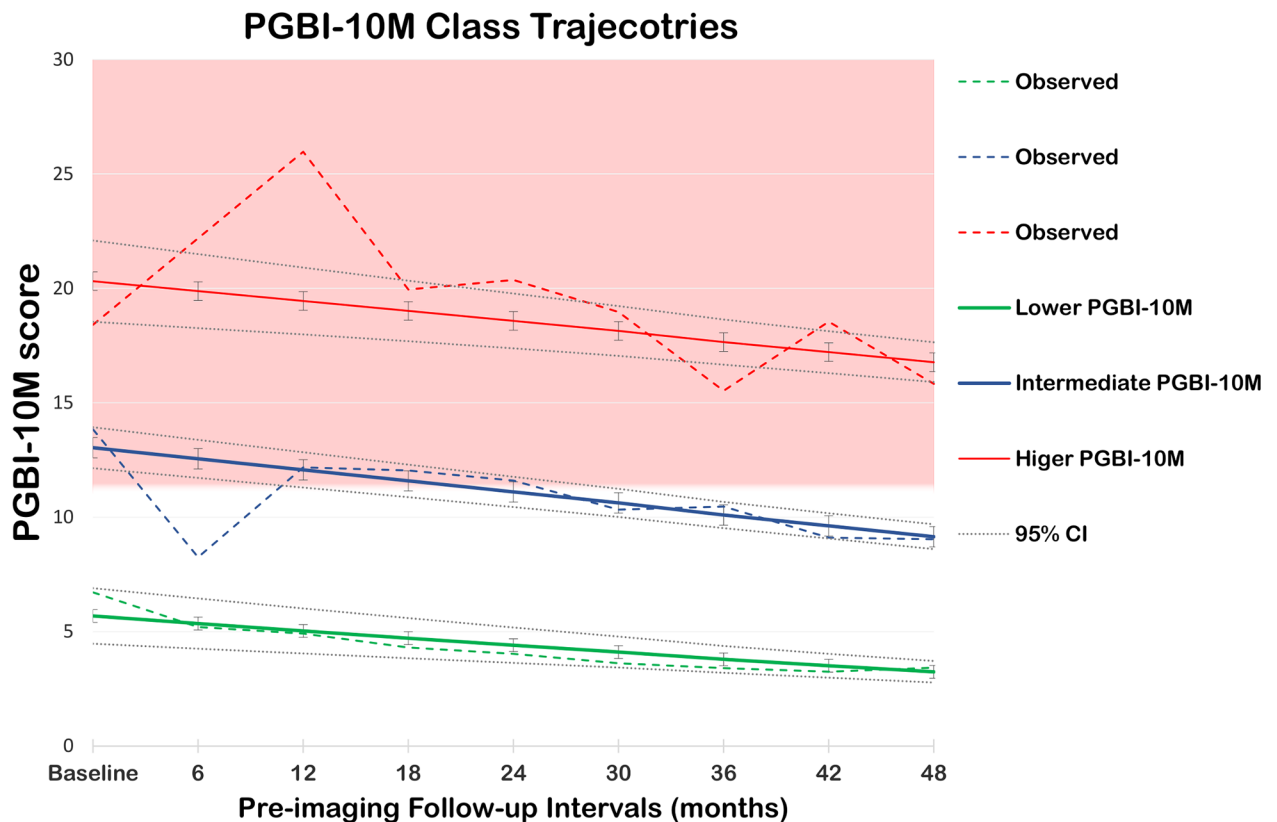

**Fig 2.** Line plot shows main class-trajectories identified in the 115 LAMS youth study participants. The red line represents the class-trajectory of LAMS youth with initially high and subsequently improving PGBI-10M scores, the blue line represents the class-trajectory of LAMS youth with intermediate PGBI-10M scores and the green line represents the class-trajectory of LAMS youth with initially low and subsequently improving PGBI-10M scores in the pre-imaging follow-up period (5 years). The pink area represents the clinically significant range of PGBI-10M (>12).

<https://doi.org/10.1371/journal.pone.0180221.g002>

Two additional analyses determined the extent to which cortical thickness could accurately classify LAMS youth with higher PGB-10M trajectories vs. control youth (n = 31) and LAMS youth with lower PGB-10M trajectories vs. control youth (see additional results, Figure A and Figure B in the S1 Materials).

### Exploratory analyses

In the 18 LAMS youth with higher PGBI-10M trajectories and the 36 LAMS youth with lower PGBI-10M trajectories, there were no significant relationships among clinical variables, including KMRS, KDRS, SCARED scores on the day of the scan and cortical thickness in any of the regions that discriminated the two extreme PGBI-10M trajectories (for patterns of cortical thickening, see Table C in the S1 Materials; for patterns of cortical thinning, see Table D in the S1 Materials).

### Discussion

Our main findings revealed that patterns of widespread cortical thickening in portions of the left dorsolateral prefrontal cortex (including the caudal middle frontal gyrus and pars triangularis of the inferior frontal gyrus), medial parietal (left and right precuneus) cortex and lateral portions of the right temporal cortex, but cortical thinning in the right dorsolateral prefrontal

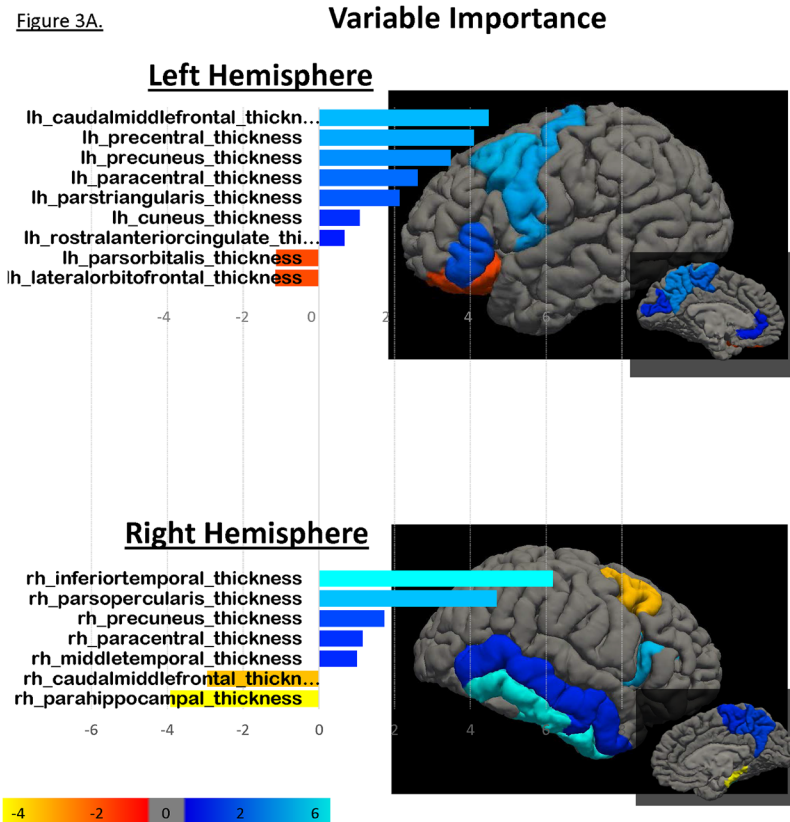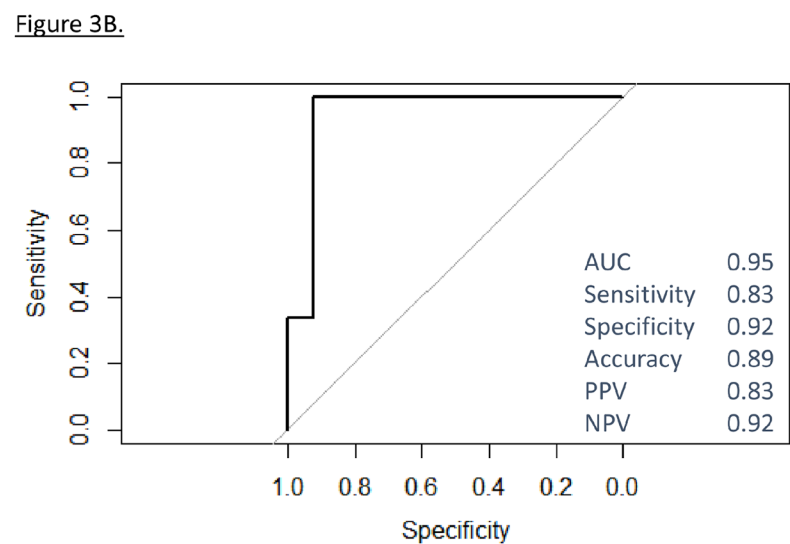

**Fig 3. Left Panel.** Bar plot represents cortical regions having from-higher-to-lower rank of importance in contributing to PGBI-10M trajectory-classification, i.e., differentiating LAMS youth with higher, from LAMS youth with lower, PGBI-10M trajectory. Blue bars represent regions in which greater cortical thickness contributed to this classification, while red bars represent regions in which lower cortical thickness contributed to this classification. Variable importance is also represented on the anatomical (mprage) image of one of our participant where color map reflects the relative contribution of each brain region using beta values, in accordance with the color-coding convention of the bar plot. Gray areas represent brain regions that did not contribute into the model. **Right Panel.** AUC plot.

<https://doi.org/10.1371/journal.pone.0180221.g003>

cortex (including the caudal middle frontal gyrus), left ventrolateral prefrontal cortex (including the lateral orbitofrontal gyrus and the pars orbitalis of the inferior frontal gyrus) and right parahippocampal gyrus accurately distinguished LAMS youth with higher, from those with lower, PGBI-10M trajectories.

These findings parallel previous findings of predominantly increased cortical volumes in a sample of 32 youth with emotional dysregulation and/or behavioral disorders who converted to BPSD (relative to healthy youth).[29] Importantly, in the present study we did not focus on single diagnoses, but rather looked at different trajectories of positive mood and energy dysregulation up to five years that cut across diagnoses. This might in part explain the differences in findings of the present study with those observed in Gogtay et al. Decreases in frontal cortical thickness in adolescents with BPSD relative to healthy control youth were also reported,[51] but only generic measures of cortical thickness for frontal, temporal and parietal lobes were provided in this latter study. Thus, further speculations are not possible. Recent studies reported increased prefrontal cortical thickness (inferior frontal gyrus) in youth at high genetic risk of mood disorders who subsequently developed depressive symptoms.[52] In these youth, reduced cortical thickness in the right parahippocampal(50) (and right fusiform gyri)[52, 53] were also reported. Together, these findings indicate that combinations of increased and decreased cortical thickness are associated with presence of, and/or risk for future, psychiatric disorders, and partially parallel findings in the present study.

There are also some remarkable parallels between findings from the present study and our previous LAMS neuroimaging studies. For example, we previously showed a positive correlation between PGBI-10M-score at scan and left middle prefrontal cortical activity to win trials during a reward paradigm in LAMS youth.[54] Our present finding of greater cortical thickness in the left caudal middle frontal gyrus in LAMS youth with higher PGBI-10M trajectories than in LAMS youth with lower PGBI-10M trajectories parallel this finding, and suggest that cortical abnormalities in the left middle frontal gyrus may underline heightened reward sensitivity and greater attention to reward stimuli in emotionally and behaviorally dysregulated youth, regardless of diagnosis.

There are limitations. 1. Specifically, trajectories were based on pre-imaging clinical assessments and only one neuroimaging scan was acquired. Future studies with post-imaging clinical trajectories and more than one neuroimaging measure are needed to determine the relationship between developmental changes in neuroimaging measures and how these changes can predict future symptom trajectories. 2. In this study, we focused on the two extreme (higher and lower) PGBI-10M classes. These two classes are clinically distinct, and therefore appropriate for the identification of a discriminant algorithm. It is worth mentioning that these classes resemble the two main PGBI-10M classes that were previously reported in the entire LAMS sample ( $n = 707$ ) using 24-month trajectories (see Table E in [S1 Materials](#)). [23, 35] To take advantage of the unique longitudinal design, in the present study we focused on the subsample of LAMS youth with neuroimaging data who were clinically characterized for up to 5 years. This is the only study that combines such a long longitudinal design and neuroimaging. The number of youth within these classes is, however, relatively small and this represents a limitation of the study. Yet, the Positive and Negative Predicted Values (PPV = 0.83 and NPV = 0.92, respectively) were high and indicated that the neuroimaging patterns identified in the training sample were able to accurately classify 5 out of 6 youth with higher (PPV) and 12 out of 13 youth with lower (NPV) PGBI-10M trajectories in the independent (i.e., randomly selected a priori) testing sample. 3. The 5-year trajectories were based on the PGBI-10M, which is a parental report of the child's difficulty regulating positive mood and energy. While parental reports are largely employed in research settings as a way to collect clinically relevant information based on mile-stone assessments of observed behaviors (i.e., the

observation of the child's 'performance' in a natural setting), these instruments might lack of norm-reference (i.e., limitation of a parent in comparing the functioning of his own child in relation to other children). 4. Cortical subregions were parcellated using FreeSurfer, which offers a fully automated parcellation method. Parcellated regions were then visually inspected for gross artifacts. In addition, a data quality protocol was used, in accordance with the protocol proposed by the ENIGMA project (<http://enigma.ini.usc.edu/protocols/imaging-protocols>; see the [S1 Materials](#)). While a recent study comparing measures of manually edited vs. unedited FreeSurfer cortical regions did not find significant between-method differences,[55] inaccuracies can occur in automated parcellation methods and further studies may be needed to quantify the accuracy of these measures.

Importantly, the present study indicates for the first time how the combined use of cortical thickness measures, symptom trajectory analysis and machine learning can identify clusters of neural regions that accurately classify individual youth into groups defined by symptom trajectories over time, specifically trajectories of observed behaviors associated with positive mood and energy regulation, in a large sample of youth recruited transdiagnostically. This approach holds promise as a strategy to identify objective neural markers reflecting pathophysiologic mechanisms underlying emotional dysregulation that can classify individual youth, case by case, in terms of clinical course. Future studies can use such an approach to identify patterns of neural markers that predict future clinical course.

## Supporting information

**S1 Materials. Additional information concerning neuroimaging acquisition and quality control procedure in neuroimaging data analyses, additional results in LAMS Youth with Higher (or Lower) PGBI-10M Trajectories vs typically developing youth, supplemental tables (i.e., Table A-D) and figures (i.e., Figure A-B).**

(DOCX)

## Acknowledgments

This research was supported by the National Institute of Mental Health grant 2R01 MH73953-06A1 (Birmaher and Phillips, University of Pittsburgh) and by the Pittsburgh Foundation (Phillips, University of Pittsburgh Emmerling Endowed Chair in Psychotic Disorders).

## Author Contributions

**Conceptualization:** Amelia Versace, Vinod Sharma, Satish Iyengar, Mary L. Phillips.

**Data curation:** Amelia Versace, Vinod Sharma, Michele A. Bertocci, Genna Bebko, Amanda Dwojak, Lisa Bonar, Claudiu Schirda, Mary Kay Gill, Mary L. Phillips.

**Formal analysis:** Amelia Versace, Vinod Sharma.

**Funding acquisition:** Vaibhav A. Diwadkar, Jeffrey L. Sunshine, Scott K. Holland, Robert A. Kowatch, Boris Birmaher, David Axelson, Thomas W. Frazier, L. Eugene Arnold, Mary A. Fristad, Eric A. Youngstrom, Sarah M. Horwitz, Robert L. Findling, Mary L. Phillips.

**Investigation:** Amelia Versace, Vinod Sharma, Michele A. Bertocci, Genna Bebko, Satish Iyengar, Amanda Dwojak, Lisa Bonar, Susan B. Perlman, Claudiu Schirda, Michael Travis, Mary Kay Gill, Vaibhav A. Diwadkar, Jeffrey L. Sunshine, Scott K. Holland, Robert A. Kowatch, Boris Birmaher, David Axelson, Thomas W. Frazier, L. Eugene Arnold, Mary A. Fristad, Eric A. Youngstrom, Sarah M. Horwitz, Robert L. Findling, Mary L. Phillips.

**Methodology:** Amelia Versace, Vinod Sharma, Mary L. Phillips.

**Project administration:** Lisa Bonar, Mary Kay Gill, Boris Birmaher, Robert L. Findling, Mary L. Phillips.

**Resources:** Boris Birmaher, Mary L. Phillips.

**Software:** Amelia Versace, Vinod Sharma.

**Supervision:** Mary L. Phillips.

**Validation:** Amelia Versace, Vinod Sharma.

**Visualization:** Amelia Versace.

**Writing – original draft:** Amelia Versace, Mary L. Phillips.

**Writing – review & editing:** Amelia Versace, Vinod Sharma, Michele A. Bertocci, Genna Bebko, Satish Iyengar, Amanda Dwojak, Lisa Bonar, Susan B. Perlman, Claudiu Schirda, Michael Travis, Mary Kay Gill, Vaibhav A. Diwadkar, Jeffrey L. Sunshine, Scott K. Holland, Robert A. Kowatch, Boris Birmaher, David Axelson, Thomas W. Frazier, L. Eugene Arnold, Mary A. Fristad, Eric A. Youngstrom, Sarah M. Horwitz, Robert L. Findling, Mary L. Phillips.

## References

1. Leibenluft E, Charney DS, Pine DS. Researching the pathophysiology of pediatric bipolar disorder. *Biol Psychiatry*. 2003; 53(11):1009–20. PMID: [12788246](#)
2. Findling RL, Youngstrom EA, Fristad MA, Birmaher B, Kowatch RA, Arnold LE, et al. Characteristics of children with elevated symptoms of mania: the Longitudinal Assessment of Manic Symptoms (LAMS) study. *J Clin Psychiatry*. 2010; 71(12):1664–72. <https://doi.org/10.4088/JCP.09m05859yel> PMID: [21034685](#)
3. Birmaher B, Axelson D, Goldstein B, Strober M, Gill MK, Hunt J, et al. Four-year longitudinal course of children and adolescents with bipolar spectrum disorders: the Course and Outcome of Bipolar Youth (COBY) study. *Am J Psychiatry*. 2009; 166(7):795–804. Epub 2009/05/19. <https://doi.org/10.1176/appi.ajp.2009.08101569> PMID: [19448190](#);
4. Carlson GA, Kelly KL. Manic symptoms in psychiatrically hospitalized children—what do they mean? *Journal of Affective Disorders*. 1998; 51(2):123–35. [http://dx.doi.org/10.1016/S0165-0327\(98\)00211-0](http://dx.doi.org/10.1016/S0165-0327(98)00211-0). PMID: [10743845](#)
5. Copeland WE, Angold A, Costello EJ, Egger H. Prevalence, comorbidity, and correlates of DSM-5 proposed disruptive mood dysregulation disorder. *Am J Psychiatry*. 2013; 170(2):173–9. <https://doi.org/10.1176/appi.ajp.2012.12010132> PMID: [23377638](#)
6. Salters-Pedneault K, Roemer L, Tull TM, Rucker L, Mennin SD. Evidence of Broad Deficits in Emotion Regulation Associated with Chronic Worry and Generalized Anxiety Disorder. *Cognitive Therapy and Research*. 2006; 30(4):469–80. <https://doi.org/10.1007/s10608-006-9055-4>
7. Rosen PJ, Walerius DM, Fogleman ND, Factor PI. The association of emotional lability and emotional and behavioral difficulties among children with and without ADHD. *Atten Defic Hyperact Disord*. 2015; 7(4):281–94. <https://doi.org/10.1007/s12402-015-0175-0> PMID: [25957599](#)
8. Bunford N, Evans SW, Becker SP, Langberg JM. Attention-deficit/hyperactivity disorder and social skills in youth: a moderated mediation model of emotion dysregulation and depression. *J Abnorm Child Psychol*. 2015; 43(2):283–96. <https://doi.org/10.1007/s10802-014-9909-2> PMID: [25037460](#)
9. Hazell PL, Carr V, Lewin TJ, Sly K. Manic Symptoms in Young Males With ADHD Predict Functioning But Not Diagnosis After 6 Years. *Journal of the American Academy of Child and Adolescent Psychiatry*. 2003; 42(5):552–60. <http://dx.doi.org/10.1097/01.CHI.0000046830.95464.33>. PMID: [12707559](#)
10. Shaw P, Stringaris A, Nigg J, Leibenluft E. Emotion Dysregulation in Attention Deficit Hyperactivity Disorder. *Am J Psychiatry*. 2014; 171(3):276–93. <https://doi.org/10.1176/appi.ajp.2013.13070966> PMID: [24480998](#).
11. Cavanagh M, Quinn D, Duncan D, Graham T, Balbuena L. Oppositional Defiant Disorder Is Better Conceptualized as a Disorder of Emotional Regulation. *J Atten Disord*. 2014; 13:13.

12. Heller AS, Casey BJ. The neurodynamics of emotion: delineating typical and atypical emotional processes during adolescence. *Dev Sci.* 2016; 19(1):3–18. <https://doi.org/10.1111/desc.12373> PMID: [26548573](https://pubmed.ncbi.nlm.nih.gov/26548573/)
13. Cole PM, Michel MK, Teti LO. The development of emotion regulation and dysregulation: a clinical perspective. *Monogr Soc Res Child Dev.* 1994; 59(2–3):73–100. PMID: [7984169](https://pubmed.ncbi.nlm.nih.gov/7984169/)
14. Larson RW, Moneta G, Richards MH, Wilson S. Continuity, Stability, and Change in Daily Emotional Experience across Adolescence. *Child Dev.* 2002; 73(4):1151–65. <https://doi.org/10.1111/1467-8624.00464> PMID: [12146740](https://pubmed.ncbi.nlm.nih.gov/12146740/)
15. Findling RL, Youngstrom EA, Fristad MA, Birmaher B, Kowatch RA, Arnold LE, et al. Characteristics of children with elevated symptoms of mania: the Longitudinal Assessment of Manic Symptoms (LAMS) study. *The Journal of clinical psychiatry.* 2010; 71(12):1664. <https://doi.org/10.4088/JCP.09m05859yel> PMID: [21034685](https://pubmed.ncbi.nlm.nih.gov/21034685/)
16. Horwitz SM, Demeter C, Pagano ME, Youngstrom EA, Fristad MA, Arnold LE, et al. Longitudinal Assessment of Manic Symptoms (LAMS) Study: background, design and initial screening results. *The Journal of clinical psychiatry.* 2010; 71(11):1511. <https://doi.org/10.4088/JCP.09m05835yel> PMID: [21034684](https://pubmed.ncbi.nlm.nih.gov/21034684/)
17. Insel T, Cuthbert B, Garvey M, Heinssen R, Pine D, Quinn K, et al. Research domain criteria (RDoC): toward a new classification framework for research on mental disorders. *American Journal of Psychiatry.* 2010; 167(7):748–51. <https://doi.org/10.1176/appi.ajp.2010.09091379> PMID: [20595427](https://pubmed.ncbi.nlm.nih.gov/20595427/)
18. Insel TR, Gogtay N. National institute of mental health clinical trials: New opportunities, new expectations. *JAMA Psychiatry.* 2014; 71(7):745–6. <https://doi.org/10.1001/jamapsychiatry.2014.426> PMID: [24806613](https://pubmed.ncbi.nlm.nih.gov/24806613/)
19. Berkman ET, Falk EB. Beyond Brain Mapping Using Neural Measures to Predict Real-World Outcomes. *Current Directions in Psychological Science.* 2013; 22(1):45–50. <https://doi.org/10.1177/0963721412469394> PMID: [24478540](https://pubmed.ncbi.nlm.nih.gov/24478540/)
20. Youngstrom EA, Frazier TW, Demeter C, Calabrese JR, Findling RL. Developing a 10-item mania scale from the Parent General Behavior Inventory for children and adolescents. *J Clin Psychiatry.* 2008; 69(5):831–9. Epub 2008/05/03. PMID: [18452343](https://pubmed.ncbi.nlm.nih.gov/18452343/);
21. Frazier TW, Youngstrom EA, Horwitz SM, Demeter CA, Fristad MA, Arnold LE, et al. Relationship of persistent manic symptoms to the diagnosis of pediatric bipolar spectrum disorders. *J Clin Psychiatry.* 2011; 72(6):846–53. Epub 2011/04/05. <https://doi.org/10.4088/JCP.10m06081yel> PMID: [21457674](https://pubmed.ncbi.nlm.nih.gov/21457674/);
22. Horwitz SM, Demeter CA, Pagano ME, Youngstrom EA, Fristad MA, Arnold LE, et al. Longitudinal Assessment of Manic Symptoms (LAMS) study: background, design, and initial screening results. *J Clin Psychiatry.* 2010; 71(11):1511–7. Epub 2010/11/03. <https://doi.org/10.4088/JCP.09m05835yel> PMID: [21034684](https://pubmed.ncbi.nlm.nih.gov/21034684/);
23. Bertocci MA, Bebek G, Fournier J, Hinze A, Olino T, Almeida J, et al. Latent Class Analysis of Parent General Behavior Inventory Associated with Neural Response on and Emotion Regulation Task. *Biol Psychiatry.* 2013; 73(9):195S–S.
24. Dale AM, Fischl B, Sereno MI. Cortical Surface-Based Analysis: I. Segmentation and Surface Reconstruction. *Neuroimage.* 1999; 9(2):179–94. <http://dx.doi.org/10.1006/nimg.1998.0395>. PMID: [9931268](https://pubmed.ncbi.nlm.nih.gov/9931268/)
25. Fischl B, Dale AM. Measuring the thickness of the human cerebral cortex from magnetic resonance images. *Proceedings of the National Academy of Sciences of the United States of America.* 2000; 97(20):11050–5. <https://doi.org/10.1073/pnas.200033797> PMID: [10984517](https://pubmed.ncbi.nlm.nih.gov/10984517/)
26. Fischl B, Sereno MI, Dale AM. Cortical Surface-Based Analysis: II: Inflation, Flattening, and a Surface-Based Coordinate System. *Neuroimage.* 1999; 9(2):195–207. <http://dx.doi.org/10.1006/nimg.1998.0396>. PMID: [9931269](https://pubmed.ncbi.nlm.nih.gov/9931269/)
27. Panizzon MS, Fennema-Notestine C, Eyer LT, Jernigan TL, Prom-Wormley E, Neale M, et al. Distinct Genetic Influences on Cortical Surface Area and Cortical Thickness. *Cereb Cortex.* 2009; 19(11):2728–35. <https://doi.org/10.1093/cercor/bhp026> PMID: [19299253](https://pubmed.ncbi.nlm.nih.gov/19299253/)
28. Winkler AM, Kochunov P, Blangero J, Almasy L, Zilles K, Fox PT, et al. Cortical thickness or grey matter volume? The importance of selecting the phenotype for imaging genetics studies. *Neuroimage.* 2010; 53(3):1135–46. <http://dx.doi.org/10.1016/j.neuroimage.2009.12.028>. PMID: [20006715](https://pubmed.ncbi.nlm.nih.gov/20006715/)
29. Gogtay N, Ordonez A, Herman DH, Hayashi KM, Greenstein D, Vaituzis C, et al. Dynamic mapping of cortical development before and after the onset of pediatric bipolar illness. *Journal of Child Psychology and Psychiatry.* 2007; 48(9):852–62. <https://doi.org/10.1111/j.1469-7610.2007.01747.x> PMID: [17714370](https://pubmed.ncbi.nlm.nih.gov/17714370/)
30. Shaw P, Lerch J, Greenstein D, Sharp W, Clasen L, Evans A, et al. Longitudinal mapping of cortical thickness and clinical outcome in children and adolescents with attention-deficit/hyperactivity disorder. *Arch Gen Psychiatry.* 2006; 63(5):540–9. <https://doi.org/10.1001/archpsyc.63.5.540> PMID: [16651511](https://pubmed.ncbi.nlm.nih.gov/16651511/)

31. Shaw P, Eckstrand K, Sharp W, Blumenthal J, Lerch JP, Greenstein D, et al. Attention-deficit/hyperactivity disorder is characterized by a delay in cortical maturation. *Proceedings of the National Academy of Sciences of the United States of America*. 2007; 104(49):19649–54. <https://doi.org/10.1073/pnas.0707741104> PMID: 18024590
32. Wallace GL, White SF, Robustelli B, Sinclair S, Hwang S, Martin A, et al. Cortical and subcortical abnormalities in youths with conduct disorder and elevated callous-unemotional traits. *Journal of the American Academy of Child and Adolescent Psychiatry*. 2014; 53(4):456–65. <https://doi.org/10.1016/j.jaac.2013.12.008> PMID: 24655655
33. Orrù G, Pettersson-Yeo W, Marquand AF, Sartori G, Mechelli A. Using Support Vector Machine to identify imaging biomarkers of neurological and psychiatric disease: A critical review. *Neurosci Biobehav Rev*. 2012; 36(4):1140–52. <http://dx.doi.org/10.1016/j.neubiorev.2012.01.004>. PMID: 22305994
34. Hastie T, Tibshirani R, Friedman JH. *The elements of statistical learning: data mining, inference, and prediction*. 2nd ed. New York, NY: Springer; 2009. xxii, 745 p. p.
35. Findling RL, Jo B, Frazier TW, Youngstrom EA, Demeter CA, Fristad MA, et al. The 24-month course of manic symptoms in children. *Bipolar Disord*. 2013; 15(6):669–79. Epub 2013/06/27. <https://doi.org/10.1111/bdi.12100> PMID: 23799945;
36. Youngstrom E, Meyers O, Demeter C, Youngstrom J, Morello L, Piiparinen R, et al. Comparing diagnostic checklists for pediatric bipolar disorder in academic and community mental health settings. *Bipolar Disord*. 2005; 7(6):507–17. Epub 2006/01/13. <https://doi.org/10.1111/j.1399-5618.2005.00269.x> PMID: 16403176.
37. Birmaher B, Khetarpal S, Brent D, Cully M, Balach L, Kaufman J, et al. The Screen for Child Anxiety Related Emotional Disorders (SCARED): scale construction and psychometric characteristics. *Journal of the American Academy of Child and Adolescent Psychiatry*. 1997; 36(4):545–53. Epub 1997/04/01. <https://doi.org/10.1097/00004583-199704000-00018> PMID: 9100430.
38. Axelson D, Birmaher BJ, Brent D, Wassick S, Hoover C, Bridge J, et al. A preliminary study of the Kiddie Schedule for Affective Disorders and Schizophrenia for School-Age Children mania rating scale for children and adolescents. *J Child Adolesc Psychopharmacol*. 2003; 13(4):463–70. Epub 2004/02/24. <https://doi.org/10.1089/104454603322724850> PMID: 14977459.
39. Kaufman J, Birmaher B, Brent D, Rao UMA, Flynn C, Moreci P, et al. Schedule for Affective Disorders and Schizophrenia for School-Age Children—Present and Lifetime Version (K-SADS-PL): Initial Reliability and Validity Data. *Journal of the American Academy of Child and Adolescent Psychiatry*. 1997; 36(7):980–8. PMID: 9204677
40. Jones BL, Nagin DS. Advances in Group-Based Trajectory Modeling and an SAS Procedure for Estimating Them. *Sociological Methods & Research*. 2007; 35(4):542–71. <https://doi.org/10.1177/0049124106292364>
41. Jones BL, Nagin DS. A Note on a Stata Plugin for Estimating Group-based Trajectory Models. *Sociological Methods & Research*. 2013. <https://doi.org/10.1177/0049124113503141>
42. Kuo SY, Lin KM, Chen CY, Chuang YL, Chen WJ. Depression trajectories and obesity among the elderly in Taiwan. *Psychol Med*. 2011; 41(8):1665–76. <https://doi.org/10.1017/S0033291710002473> PMID: 21208492
43. Andreescu C, Chang CC, Mulsant BH, Ganguli M. Twelve-year depressive symptom trajectories and their predictors in a community sample of older adults. *Int Psychogeriatr*. 2008; 20(2):221–36. <https://doi.org/10.1017/S1041610207006667> PMID: 18234145
44. Group-based modeling of development. *Choice: Current Reviews for Academic Libraries*. 2005; 43(2):375-.
45. Paternoster R, Brame R, Mazerolle P, Piquero A. Using the correct statistical test for the equality of regression coefficients. *Criminology*. 1998; 36(4):859–66. <https://doi.org/10.1111/j.1745-9125.1998.tb01268.x>
46. Friedman J, Hastie T, Tibshirani R. Regularization Paths for Generalized Linear Models via Coordinate Descent. *J Stat Softw*. 2010; 33(1):1–22. Epub 2010/09/03. PMID: 20808728;
47. Hoerl AE, Kennard RW. Ridge Regression—Biased Estimation for Nonorthogonal Problems. *Technometrics*. 1970; 12(1):55-8.
48. Tibshirani R. Regression Shrinkage and Selection via the Lasso. *Journal of the Royal Statistical Society Series B (Methodological)*. 1996; 58(1):267–88.
49. Zou H, Hastie T. Regularization and variable selection via the elastic net (vol B 67, pg 301, 2005). *J Roy Stat Soc B*. 2005; 67:768-. <https://doi.org/10.1111/j.1467-9868.2005.00527.x>
50. Metz CE. Basic principles of ROC analysis. *Semin Nucl Med*. 1978; 8(4):283–98. Epub 1978/10/01. PMID: 112681.



51. Janssen J, Aleman-Gomez Y, Schnack H, Balaban E, Pina-Camacho L, Alfaro-Almagro F, et al. Cortical morphology of adolescents with bipolar disorder and with schizophrenia. *Schizophr Res*. 2014; 158(1–3):91–9. <https://doi.org/10.1016/j.schres.2014.06.040> PMID: 25085384
52. Foland-Ross LC, Gilbert BL, Joormann J, Gotlib IH. Neural markers of familial risk for depression: An investigation of cortical thickness abnormalities in healthy adolescent daughters of mothers with recurrent depression. *J Abnorm Psychol*. 2015; 124(3):476–85. <https://doi.org/10.1037/abn0000050> PMID: 25894441
53. Pappmeyer M, Giles S, Sussmann JE, Kieley S, Stewart T, Lawrie SM, et al. Cortical thickness in individuals at high familial risk of mood disorders as they develop major depressive disorder. *Biol Psychiatry*. 2015; 78(1):58–66. <https://doi.org/10.1016/j.biopsych.2014.10.018> PMID: 25534753
54. Bebko G, Bertocci MA, Fournier JC, Hinze AK, Bonar L, Almeida JRC, et al. Parsing Dimensional vs Diagnostic Category-Related Patterns of Reward Circuitry Function in Behaviorally and Emotionally Dysregulated Youth in the Longitudinal Assessment of Manic Symptoms Study. *JAMA Psychiatry*. 2014; 71(1):71–80. <https://doi.org/10.1001/jamapsychiatry.2013.2870> PMID: 24285346
55. McCarthy CS, Ramprashad A, Thompson C, Botti JA, Coman IL, Kates WR. A comparison of FreeSurfer-generated data with and without manual intervention. *Front Neurosci*. 2015; 9(379).
